# Supplementary material
Source: PubMed Central journal article supplement (PMC4518825)
Supplement: JB.00262-15_zjb999093681so1.pdf [file JB.00262-15_zjb999093681so1.pdf]

**Table S1. Primers used in this work.**

| Primer                        | Nucleotide sequence                                        | Application                                                     |
|-------------------------------|------------------------------------------------------------|-----------------------------------------------------------------|
| 16s nono left                 | AGCTTGTTGGTGGGGTAGTG                                       | qRT-PCR control                                                 |
| 16s nono r                    | TCACCGCTACACCAGGAATT                                       |                                                                 |
| <i>hrdB</i> rev               | CTGGCGGATGCGCTCACGCGTGAC                                   | qRT-PCR control                                                 |
| <i>hrdB</i> for               | CTCGCTGGCCAAGCGCTACACCGG                                   |                                                                 |
| <i>dbv1</i> rt rev            | GCCTTCGACCGGGTGTTCCTG                                      | qRT-PCR- <i>dbv1</i>                                            |
| <i>dbv1</i> rt for            | TTGCGGATGTCACGTGGCCTG                                      |                                                                 |
| <i>dbv3</i> rt rev            | GCCGGCTGGACGTGAAGGTGA                                      | qRT-PCR- <i>dbv3</i>                                            |
| <i>dbv3</i> rt for            | CGACACTCCGCCAGCAGCAG                                       |                                                                 |
| <i>dbv4</i> rt rev            | GCTCCAACCGGCCTCTCACATC                                     | qRT-PCR - <i>dbv4</i>                                           |
| <i>dbv4</i> rt for            | GGGGTGAACAACAATCTCGGTGA                                    |                                                                 |
| <i>dbv6</i> rt rev            | AGCCTGGGCGCCGACTAT                                         | qRT-PCR - <i>dbv6</i>                                           |
| <i>dbv6</i> rt for            | GCGCGGACGGTTTCGATCA                                        |                                                                 |
| <i>dbv7</i> rt rev            | GGTGGGTAGCCCGTGGT                                          | qRT-PCR - <i>dbv7</i>                                           |
| <i>dbv7</i> rt for            | GGGTGCTCGCGTGTCTCTG                                        |                                                                 |
| <i>dbv8</i> rt rev            | ATGGGCGACTACAAGGTGAA                                       | qRT-PCR - <i>dbv8</i>                                           |
| <i>dbv8</i> rt for            | AATAGATGTCGGGGATCAGC                                       |                                                                 |
| <i>dbv14</i> rt rev           | AGCATGTCGTCGCCGGATC                                        | qRT-PCR - <i>dbv14</i>                                          |
| <i>dbv14</i> rt for           | GGTGTGGGCTCGGACAAGTTC                                      |                                                                 |
| <i>dbv15</i> rt rev           | GATGAGACTCTCGGCCGGATGT                                     | qRT-PCR - <i>dbv15</i>                                          |
| <i>dbv15</i> rt for           | CGGCTCCTCCTCGTCTCTG                                        |                                                                 |
| <i>dbv17</i> rt rev           | TCGGCAGCGAAATCAGGTGA                                       | qRT-PCR - <i>dbv17</i>                                          |
| <i>dbv17</i> rt for           | CCTCGACACCCCGAGCTCC                                        |                                                                 |
| <i>dbv19</i> rt rev           | GGCAAGTTCACCGGATCATGG                                      | qRT-PCR - <i>dbv19</i>                                          |
| <i>dbv19</i> rt for           | CGTCGGGGAACAGCAGATCC                                       |                                                                 |
| <i>dbv20</i> rt rev           | GCCGCTGATCGAGGAACGCC                                       | qRT-PCR - <i>dbv20</i>                                          |
| <i>dbv20</i> rt for           | CGCCCGAATCGTTCATGGAA                                       |                                                                 |
| <i>dbv22</i> rt rev           | GCAGCAGCAGCGGCCATTC                                        | qRT-PCR - <i>dbv22</i>                                          |
| <i>dbv22</i> rt for           | CCAGCGTCAGCAGGATTCCAG                                      |                                                                 |
| <i>dbv23</i> rt rev           | CAGGCTCACGTTCCGATGCT                                       | qRT-PCR - <i>dbv23</i>                                          |
| <i>dbv23</i> rt for           | CGACCGCCACTTGTGATCTTCT                                     |                                                                 |
| <i>dbv25</i> rt rev           | CGCTCCCGATCCACCTTCC                                        | qRT-PCR - <i>dbv25</i>                                          |
| <i>dbv25</i> rt for           | GCGCGGCTATCTGGTCTGTG                                       |                                                                 |
| <i>dbv28</i> rt rev           | TCCGCTACTGGGGCACGC                                         | qRT-PCR - <i>dbv28</i>                                          |
| <i>dbv28</i> rt for           | CGGCGGATATGGCGGTAGAGAA                                     |                                                                 |
| <i>dbv29</i> rt rev           | CCTGATCGAGCCGGCAACAC                                       | qRT-PCR - <i>dbv29</i>                                          |
| <i>dbv29</i> rt for           | CCGCTGTTCCGCTCGTACCA                                       |                                                                 |
| <i>dbv32</i> rt rev           | GCCGGAGTGCACCAGCCAATG                                      | qRT-PCR - <i>dbv32</i>                                          |
| <i>dbv32</i> rt for           | ATGCAACGCGGGGTGAACG                                        |                                                                 |
| <i>dbv34</i> rt for           | CGGCCAGGACCTCAAGGAACG                                      | qRT-PCR - <i>dbv34</i>                                          |
| <i>dbv34</i> rt rev           | GGCCACGCACCGATCCAGCT                                       |                                                                 |
| <i>dbv36</i> rt rev           | CGGGCAGGACGTGGCAGGAG                                       | qRT-PCR - <i>dbv36</i> gene                                     |
| <i>dbv36</i> rt for           | CGGGCAGATATGGCAGTTTG                                       |                                                                 |
| <i>dbv37</i> rt rev           | ACCGCCTCCCACGCTGAAG                                        | qRT-PCR - <i>dbv37</i> gene                                     |
| <i>dbv37</i> rt for           | CGGGTTGAGCAGGCTGATCGAC                                     |                                                                 |
| <i>dbv3</i> - <i>apra</i> for | GCCGGCCGCGGTGGAGTGGGCGTCATCACGGGCGCTGTATTCCGGGGATCCGTCGACC | To generate the $\Delta$ <i>dbv3</i> strain                     |
| <i>dbv3</i> <i>apra</i> rev   | CCTCACGCGGCTCGCGCCGGCTGTGGCCGTCGCCCTTCTGTAGGCTGGAGCTGCTTC  |                                                                 |
| <i>dbv4</i> - <i>apra</i> for | GTGGACCCGACGGGAGTTGACATAGCCACTCTCCCTGTATTCCGGGGATCCGTCGACC | To generate the $\Delta$ <i>dbv4</i> strain                     |
| <i>dbv4</i> <i>apra</i> rev   | AGCGCCAGATCGGTCGCCGCCCTCCAGGCGATCCGCTGTAGGCTGGAGCTGCTTC    |                                                                 |
| <i>dbv6</i> - <i>apra</i> for | ATGCGGTTCTGGTGGTGGAGGACCAAGTCGACCTGGCCATTCCGGGGATCCGTCGACC | To generate the $\Delta$ <i>dbv6</i> strain                     |
| <i>dbv6</i> <i>apra</i> rev   | ATGCGATATCCCTCGCGCGGGACGGTTTCGTCGCCCTTCTGTAGGCTGGAGCTGCTTC |                                                                 |
| <i>dbv3</i> tar for           | GATGAGCACGAGTGGATGAG                                       | $\Delta$ <i>dbv3</i> verification                               |
| <i>dbv3</i> tar rev           | TCACAGCAGATTCCGGTACA                                       |                                                                 |
| <i>dbv4</i> tar for           | ACTTGGCCGATCGATTTATG                                       | $\Delta$ <i>dbv4</i> verification                               |
| <i>dbv4</i> tar rev           | GAATCGAGCAACCTCGTCAG                                       |                                                                 |
| <i>dbv6</i> tar for           | ACGCGAGCTATGGTGTGAC                                        | $\Delta$ <i>dbv6</i> verification                               |
| <i>dbv6</i> tar rev           | GCTTCTCTCATCCCTCTCC                                        |                                                                 |
| <i>dbv3</i> over for          | AAAAAAACATATGCTGTTCCGGGCGAGATCG                            | To generate a <i>NdeI</i> - <i>dbv3</i> - <i>BglII</i> fragment |
| <i>dbv3</i> over rev          | AAAAAGATCTCTACAGCCGCACTGCCTCAC                             |                                                                 |

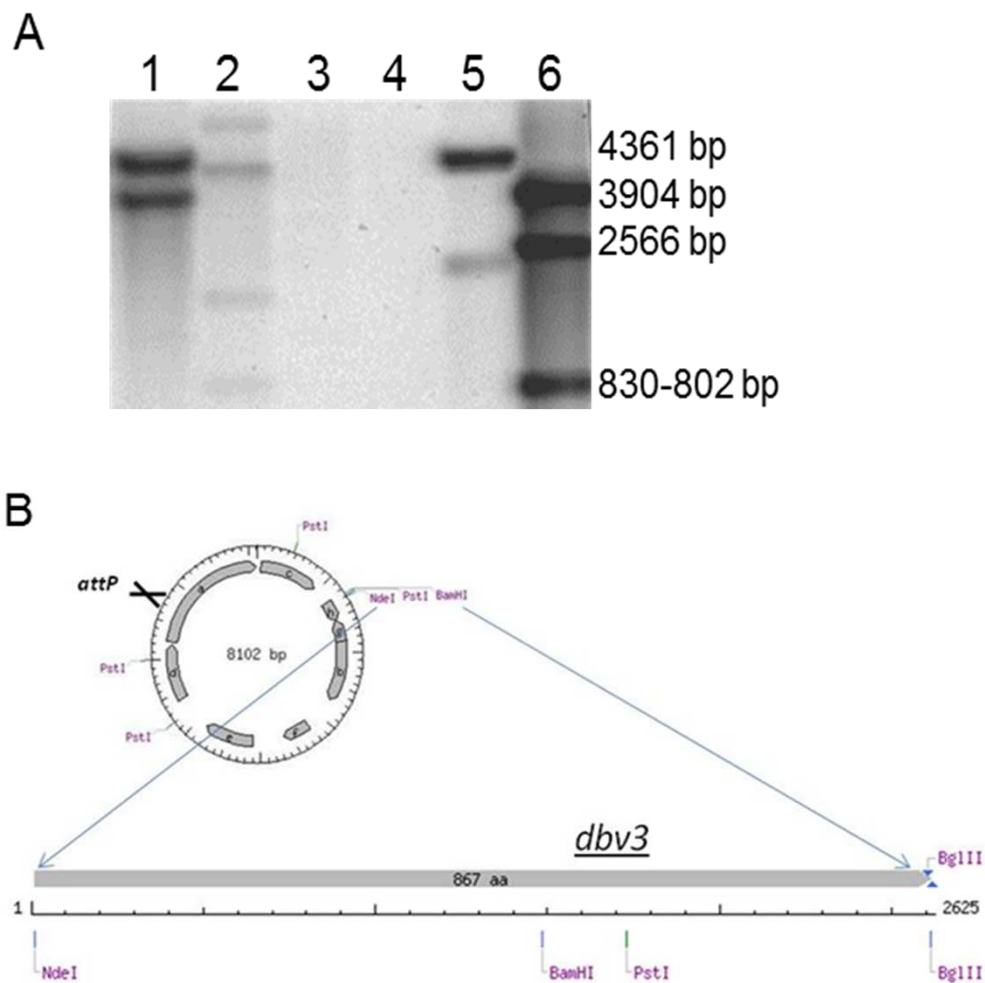

**Fig. S1** Integration of pIJ8600-*dbv3* into the *Nonomuraea* chromosome.

(a) Southern hybridization analysis of *Bam*HI-digested genomic DNA of the *Oe-dbv3* strain (lane 1), *Pst*I-cleaved genomic DNA of the *Oe-dbv3* strain (lane 2), *Bam*HI-digested genomic DNA of the wild type strain (lane 3), *Pst*I-cleaved genomic DNA of the wild type strain (lane 4). *Pst*I-digested pIJ8600 was used as a probe (lane 6). Lane 5: Marker II (Invitrogen).

(b) Schematic representation of the plasmid used to generate the *Oe-dbv3* strain. The *dbv3* gene was ligated to *Nde*I- and *Bam*HI-digested pIJ8600.

*Pst*I, *Bgl*II, *Nde*I and *Bam*HI restriction sites are indicated.

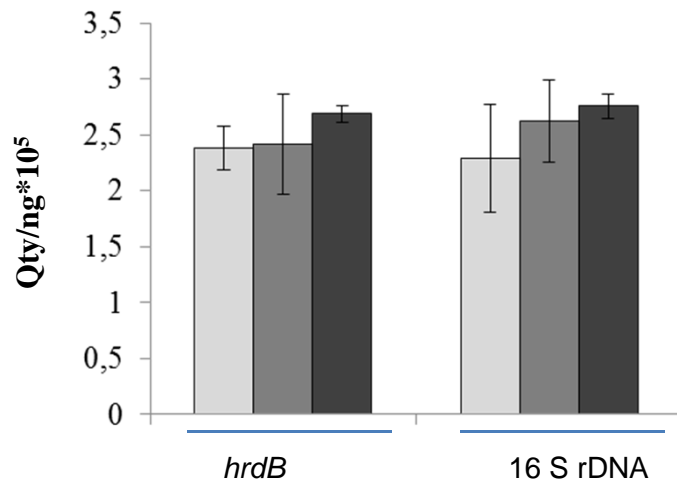

**Fig. S2** Absolute Quantitative RT-PCR of *hrdB* and 16S rDNA after 24 (white bars), 48 (gray bars) and 72h (black bars) of *Nonomuraea sp. ATCC39727* grown in R3 medium. Error bars are calculated from three independent experiments.
